# Supplementary material for: Thiazolium-derived N-heterocyclic carbene-catalyzed cross-coupling of aldehydes with unactivated imines
Source: Royal Society of Chemistry journal article supplement (doi:10.1039/b611646a), 2006-11-23

*Experimental procedures and characterization data*

*for*

**Thiazolium-Derived *N*-Heterocyclic Carbene-Catalyzed  
Cross-Coupling of Aldehydes with Unactivated Imines**

**Gong-Qiang Li, Li-Xin Dai and Shu-Li You\***

State Key Laboratory of Organometallic Chemistry  
Shanghai Institute of Organic Chemistry, Chinese Academy of Sciences  
354 Fenglin Lu, Shanghai 200032 (P. R. China)  
Fax: (+86) 21-54925087  
E-mail: [slyou@mail.sioc.ac.cn](mailto:slyou@mail.sioc.ac.cn)

**General Methods.** Unless stated otherwise, all reactions were carried out in flame-dried glassware under a dry argon atmosphere. All solvents were purified and dried according to standard methods prior to use.

<sup>1</sup>H NMR spectra were recorded on a VARIAN Mercury 300 MHz spectrometer in chloroform-d<sub>3</sub>. Chemical shifts are reported in ppm with the internal TMS signal at 0.0 ppm as a standard. The data are reported as (s = singlet, d = doublet, t = triplet, m = multiplet or unresolved, br = broad singlet, coupling constant(s) in Hz, integration).

<sup>13</sup>C NMR spectra were recorded on a VARIAN Mercury 75 MHz spectrometer in chloroform-d<sub>3</sub>. Chemical shifts are reported in ppm with the internal chloroform signal at 77.0 ppm as a standard.

Substrates **3a-3i**<sup>1</sup> and **1c**<sup>2</sup> were prepared by known literature methods.

**General Procedure of the Cross-Coupling of Aldehydes with Imines (4a):** To a solution of 3-benzyl-5-(2-hydroxyethyl)-4-methylthiazolium chloride (**1a**, 0.054 g, 0.2 mmol) in ethanol (1.0 mL), Et<sub>3</sub>N (28 μL, 0.2 mmol) was added. After the mixture was stirring for 5 min, benzaldehyde **2a** (0.12 mL, 1.2 mmol) and *N*-benzylidenebenzenamine

**3a** (0.181 g, 1.0 mmol) were added. The mixture was stirred for 2 days at 70°C. After the mixture was cooled to room temperature, the solvent was removed under reduced pressure. The residue was purified by silica gel column chromatography (PE : EtOAc = 150 : 1), affording the title compound as a yellow solid (235 mg, 82%).

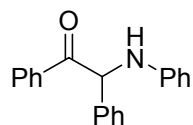

**4a:**  $^1\text{H}$  NMR ( $\text{CDCl}_3$ , 300 MHz)  $\delta$  5.42 (d, 1 H,  $J = 6.0$  Hz), 6.03 (d, 1 H,  $J = 6.0$  Hz), 6.68 (m, 3 H), 7.10-7.30 (m, 5 H), 7.40-7.46 (m, 4 H), 7.53 (m, 1 H), 8.00 (d, 2 H,  $J = 7.5$  Hz);  $^{13}\text{C}$  NMR (75 MHz,  $\text{CDCl}_3$ ):  $\delta$  62.6, 113.4, 117.8, 128.1, 128.1, 128.7, 128.8, 129.0, 129.2, 133.5, 135.0, 137.6, 146.0, 197.0.

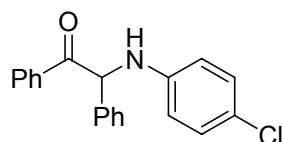

**4b:**  $^1\text{H}$  NMR ( $\text{CDCl}_3$ , 300 MHz)  $\delta$  5.46 (d, 1 H,  $J = 6.0$  Hz), 5.97 (d, 1 H,  $J = 6.0$  Hz), 6.57 (d, 2 H,  $J = 8.7$  Hz), 7.06 (d, 2 H,  $J = 8.7$  Hz), 7.16-7.30 (m, 3 H), 7.39-7.55 (m, 5 H), 7.98 (d, 2 H,  $J = 7.2$  Hz);  $^{13}\text{C}$  NMR (75 MHz,  $\text{CDCl}_3$ ):  $\delta$  62.6, 114.6, 122.4, 128.0, 128.2, 128.7, 128.8, 129.0, 129.1, 133.6, 134.8, 137.2, 144.5, 196.7.

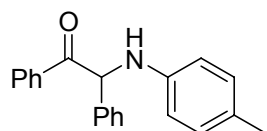

**4c:**  $^1\text{H}$  NMR ( $\text{CDCl}_3$ , 300 MHz)  $\delta$  2.18 (s, 3 H), 5.25 (br, 1 H), 6.00 (s, 1 H), 6.59 (d, 2 H,  $J = 8.1$  Hz), 6.93 (d, 2 H,  $J = 8.4$  Hz), 7.15-7.28 (m, 3 H), 7.38-7.53 (m, 5 H), 7.98 (d, 2 H,  $J = 8.1$  Hz);  $^{13}\text{C}$  NMR (75 MHz,  $\text{CDCl}_3$ ):  $\delta$  20.2, 62.8, 113.5, 126.9, 127.9, 127.9, 128.5, 128.5, 128.7, 128.8, 128.9, 129.6, 133.3, 135.0, 137.7, 143.7, 197.1; IR (thin film):  $\nu_{\text{max}}$  ( $\text{cm}^{-1}$ ) = 3396, 3022, 2852, 1674, 1617, 1524, 1450, 799, 699, 602; Anal. calcd for  $\text{C}_{21}\text{H}_{19}\text{NO}$ : C, 83.69; H, 6.35; N, 4.65; Found: C, 83.61; H, 6.40; N, 4.58.

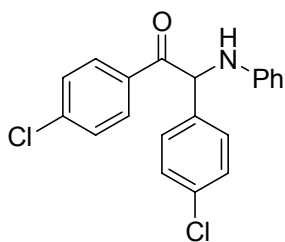

**4d:**  $^1\text{H}$  NMR ( $\text{CDCl}_3$ , 300 MHz)  $\delta$  5.37 (d, 1 H,  $J = 6.3$  Hz), 5.94 (d, 1 H,  $J = 6.0$  Hz), 6.64 (d, 2 H,  $J = 7.8$  Hz), 6.71 (t, 1 H,  $J = 7.5$  Hz), 7.14 (t, 2 H,  $J = 7.8$  Hz), 7.26 (d, 2 H,  $J = 8.4$  Hz), 7.40-7.56 (m, 4 H), 7.91 (d, 2 H,  $J = 9.0$  Hz);  $^{13}\text{C}$  NMR (75 MHz,  $\text{CDCl}_3$ ):  $\delta$  62.0, 113.4, 118.1, 129.1, 129.2, 129.3, 129.3, 130.1, 133.0, 134.1, 136.0, 140.2, 145.5, 195.4.

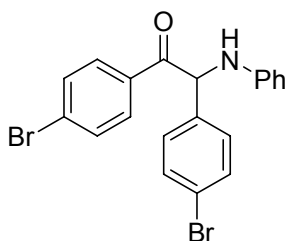

**4e:**  $^1\text{H}$  NMR ( $\text{CDCl}_3$ , 300 MHz)  $\delta$  5.37 (br, 1 H), 5.91 (s, 1 H), 6.63 (d, 2 H,  $J = 8.7$  Hz), 6.71 (t, 1 H,  $J = 7.5$  Hz), 7.14 (t, 2 H,  $J = 7.8$  Hz), 7.27 (m, 2 H), 7.41 (d, 2 H,  $J = 8.1$  Hz), 7.58 (d, 2 H,  $J = 8.7$  Hz), 7.82 (d, 2 H,  $J = 8.7$  Hz);  $^{13}\text{C}$  NMR (75 MHz,  $\text{CDCl}_3$ ):  $\delta$  62.0, 113.1, 118.2, 122.3, 129.0, 129.3, 129.6, 130.2, 132.1, 132.3, 133.4, 136.5, 145.5, 195.5; m.p. 128-131 $^\circ$ .

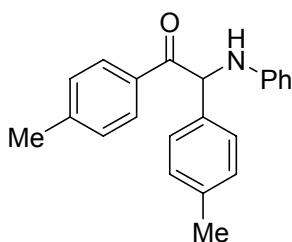

**4f:**  $^1\text{H}$  NMR ( $\text{CDCl}_3$ , 300 MHz)  $\delta$  2.18 (s, 3 H), 2.37 (s, 3 H), 5.25 (d, 2 H,  $J = 6.6$  Hz), 5.98 (d, 1 H,  $J = 6.3$  Hz), 6.58 (d, 2 H,  $J = 8.7$  Hz), 6.93 (d, 2 H,  $J = 8.1$  Hz), 7.18-7.30 (m, 4 H), 7.43 (dd, 2 H,  $J_1 = 1.8$  Hz,  $J_2 = 6.9$  Hz), 7.91 (d, 2 H,  $J = 8.1$  Hz);  $^{13}\text{C}$  NMR (75 MHz,  $\text{CDCl}_3$ ):  $\delta$  20.3, 21.6, 62.7, 113.6, 126.9, 127.9, 128.0, 128.1, 128.9, 129.0, 129.3, 129.7, 132.5, 138.1, 143.9, 144.4, 196.7;

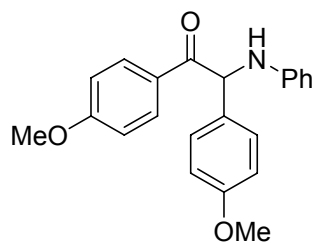

**4g:**  $^1\text{H}$  NMR ( $\text{CDCl}_3$ , 300 MHz)  $\delta$  3.72 (s, 3 H), 3.84 (s, 3 H), 5.34 (br, 1 H), 5.93 (s, 1 H), 6.67 (m, 3 H), 6.81 (d, 2 H,  $J = 8.7$  Hz), 6.90 (d, 2 H,  $J = 8.7$  Hz), 7.12 (t, 2 H,  $J = 7.5$  Hz), 7.37 (d, 2 H,  $J = 8.4$  Hz), 8.00 (d, 2 H,  $J = 8.7$  Hz);  $^{13}\text{C}$  NMR (75 MHz,  $\text{CDCl}_3$ ):  $\delta$  55.0, 55.3, 61.3, 113.4, 113.8, 114.3, 117.5, 127.7, 129.1, 130.0, 131.1, 132.2, 146.2, 159.1, 163.6, 195.3.

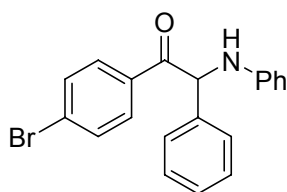

**4h:**  $^1\text{H}$  NMR ( $\text{CDCl}_3$ , 300 MHz)  $\delta$  5.36 (br, 1 H), 5.96 (br, 1 H), 6.64-6.71 (m, 3 H), 7.10-7.32 (m, 5 H), 7.42 (d, 2 H,  $J = 7.5$  Hz), 7.56 (d, 2 H,  $J = 8.4$  Hz), 7.85 (d, 2 H,  $J = 8.1$  Hz);  $^{13}\text{C}$  NMR (75 MHz,  $\text{CDCl}_3$ ):  $\delta$  62.8, 113.5, 118.0, 128.0, 128.3, 128.8, 129.2, 129.2, 130.3, 132.0, 133.7, 137.3, 145.9, 196.1; IR (thin film):  $\nu_{\text{max}}$  ( $\text{cm}^{-1}$ ) = 3397, 3018, 1670, 1602, 1504, 997, 746, 697; Anal. calcd for  $\text{C}_{20}\text{H}_{16}\text{BrNO}$ : C, 65.59; H, 4.40; N, 3.82; Found: C, 65.21; H, 4.34; N, 3.62; m.p. 160-162 $^\circ$ .

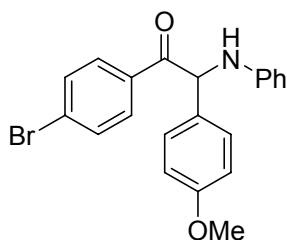

**4i:**  $^1\text{H}$  NMR ( $\text{CDCl}_3$ , 300 MHz)  $\delta$  3.73 (s, 3 H), 5.29 (d, 1 H,  $J = 4.8$  Hz), 5.91 (d, 1 H,  $J = 4.8$  Hz), 6.29-6.71 (m, 3 H), 6.80-6.84 (m, 2 H), 7.10-7.16 (m, 2 H), 7.30-7.35 (m, 2 H), 7.55-7.59 (m, 2 H), 7.82-7.87 (m, 2 H);  $^{13}\text{C}$  NMR (75 MHz,  $\text{CDCl}_3$ ):  $\delta$  55.2, 62.1, 113.5, 114.6, 117.9, 128.6, 129.1, 129.2, 129.3, 130.2, 132.0, 133.7, 146.0, 159.4, 196.1; IR (thin film):  $\nu_{\text{max}}$  ( $\text{cm}^{-1}$ ) = 3402, 2925, 1673, 1605, 1509, 1257, 997, 750, 692; Anal. calcd for  $\text{C}_{21}\text{H}_{18}\text{BrNO}_2$ : C, 63.65; H, 4.58; N, 3.53; Found: C, 63.78; H, 4.69; N, 3.31; m.p.: 152-153 $^\circ$ .

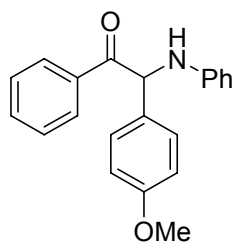

**4j:**  $^1\text{H}$  NMR ( $\text{CDCl}_3$ , 300 MHz)  $\delta$  3.72 (s, 3 H), 5.35 (d, 1 H,  $J = 5.1$  Hz), 5.98 (d, 1 H,  $J = 5.1$  Hz), 6.64-6.670 (m, 3 H), 6.81 (d, 2 H,  $J = 8.1$  Hz), 7.13 (t, 2 H,  $J = 7.5$  Hz), 7.35 (d, 2 H,  $J = 8.4$  Hz), 7.43 (m, 2 H), 7.53 (t, 1 H,  $J = 7.4$  Hz), 7.99 (d, 2 H,  $J = 7.8$  Hz);  $^{13}\text{C}$  NMR (75 MHz,  $\text{CDCl}_3$ ):  $\delta$  55.1, 61.9, 113.4, 114.4, 117.7, 128.6, 128.7, 129.1, 129.2, 129.4, 133.3, 135.0, 146.1, 159.2, 197.0; MS (ESI,  $m/z$ , rel. intensity) 318 ( $\text{M}+\text{H}^+$ , 100). HRMS (ESI) calcd for  $\text{C}_{21}\text{H}_{19}\text{NO}_2$  ( $\text{M}^+$ ): 317.1416; Found: 317.1423; m.p. 114-115°C.

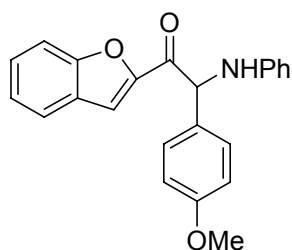

**4k:**  $^1\text{H}$  NMR ( $\text{CDCl}_3$ , 300 MHz)  $\delta$  3.73 (s, 3 H), 5.31 (d, 1 H,  $J = 3.6$  Hz), 5.95 (d, 1 H,  $J = 5.1$  Hz), 6.67-6.71 (m, 3 H), 6.84 (d, 2 H,  $J = 8.7$  Hz), 7.14 (m, 2 H), 7.30 (m, 1 H), 7.46-7.51 (m, 3 H), 7.60 (d, 2 H,  $J = 9.9$  Hz), 7.68 (d, 1 H,  $J = 7.8$  Hz);  $^{13}\text{C}$  NMR (75 MHz,  $\text{CDCl}_3$ ):  $\delta$  55.2, 62.6, 112.4, 113.5, 114.5, 114.5, 117.9, 123.4, 124.1, 126.9, 128.6, 129.0, 129.2, 129.4, 145.9, 150.8, 155.6, 159.5, 187.8; IR (thin film):  $\nu_{\text{max}}$  ( $\text{cm}^{-1}$ ) = 3391, 2926, 1676, 1604, 1562, 1506, 1315, 1253, 1163, 1024, 870, 751, 690, 605; MS (ESI,  $m/z$ , rel. intensity) 358 ( $\text{M}+\text{H}^+$ , 100); HRMS (ESI) calcd for  $\text{C}_{23}\text{H}_{19}\text{NO}_3$  ( $\text{M}^+$ ): 357.1365; Found: 357.1361; b.p. 161-163°C.

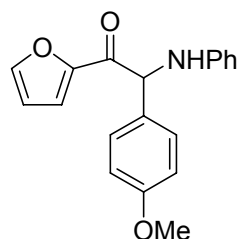

**4l:**  $^1\text{H}$  NMR ( $\text{CDCl}_3$ , 300 MHz)  $\delta$  3.74 (s, 3 H), 5.80 (s, 1 H), 6.52 (dd, 1 H,  $J_1 = 1.5$  Hz,  $J_2 = 4.1$  Hz), 6.63-6.67 (m, 3 H), 6.84 (d, 2 H,  $J = 8.7$  Hz), 7.12 (dd, 2 H,  $J_1 = 7.2$  Hz,  $J_2 = 8.4$  Hz), 7.29 (d, 1 H,  $J = 3.6$  Hz), 7.43 (d, 2 H,  $J = 8.4$  Hz), 7.60 (s, 1 H);  $^{13}\text{C}$  NMR (75

MHz, CDCl<sub>3</sub>):  $\delta$  55.1, 62.1, 112.6, 113.4, 114.3, 117.7, 118.9, 129.1, 129.2, 129.3, 145.9, 146.8, 150.8, 159.4, 185.7; IR (thin film):  $\nu_{\max}$  (cm<sup>-1</sup>) = 3406, 2970, 1662, 1603, 1509, 1462, 1257, 1028, 996, 794, 767, 692, 594; MS (ESI, *m/z*, rel. intensity) 308 (M+H<sup>+</sup>, 100); m.p.110-112°C.

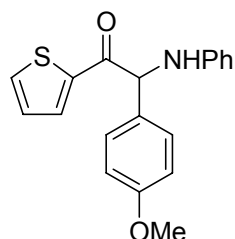

**4m:** <sup>1</sup>H NMR (CDCl<sub>3</sub>, 300 MHz)  $\delta$  3.75 (s, 3 H), 5.21 (br, 1 H), 5.74 (s, 1 H), 6.64-6.72 (m, 3 H), 6.85 (d, 2 H, *J* = 5.1 Hz), 7.13 (t, 3 H, *J* = 7.1 Hz), 7.42 (d, 2 H, *J* = 8.4 Hz), 7.64 (d, 1 H, *J* = 4.2 Hz), 7.86 (s, 1 H); <sup>13</sup>C NMR (75 MHz, CDCl<sub>3</sub>):  $\delta$  55.2, 63.5, 113.5, 114.5, 117.9, 128.2, 129.2, 129.3, 129.8, 133.1, 134.4, 141.2, 146.1, 159.5, 189.9; IR (thin film):  $\nu_{\max}$  (cm<sup>-1</sup>) = 3404, 2933, 1645, 1602, 1509, 1411, 1253, 1028, 791, 749, 690; Anal. calcd for C<sub>19</sub>H<sub>17</sub>NO<sub>2</sub>S: C, 70.56; H, 5.30; N, 4.33; Found: C, 70.35; H, 5.24; N, 4.12; m.p.108-110°C.

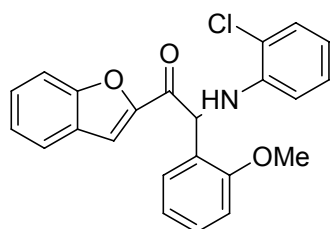

**4n:** <sup>1</sup>H NMR (CDCl<sub>3</sub>, 300 MHz)  $\delta$  4.08 (s, 3 H), 6.07 (d, 1 H, *J* = 6.0 Hz), 6.43 (d, 1 H, *J* = 6.6 Hz), 6.60 (t, 1 H, *J* = 7.2 Hz), 6.74 (d, 1 H, *J* = 8.1 Hz), 6.91 (t, 2 H, *J* = 8.1 Hz), 7.04 (t, 1 H, *J* = 7.5 Hz), 7.20-7.56 (m, 6 H), 7.68 (d, 1 H, *J* = 7.5 Hz), 7.77 (s, 1 H); <sup>13</sup>C NMR (75 MHz, CDCl<sub>3</sub>):  $\delta$  55.5, 55.7, 111.1, 112.1, 112.4, 114.5, 117.7, 119.7, 121.6, 123.4, 123.9, 125.3, 126.8, 127.6, 128.5, 128.6, 129.2, 129.8, 142.0, 150.5, 155.8, 156.6, 185.6; IR (thin film):  $\nu_{\max}$  (cm<sup>-1</sup>) = 3385, 2919, 1678, 1597, 1513, 1329, 1293, 1248, 1135, 1088, 1032, 1020, 753, 743; Anal. calcd for C<sub>23</sub>H<sub>18</sub>ClNO<sub>3</sub>: C, 70.50; H, 4.63; N, 3.57; Found: C, 70.57; H, 4.66; N, 3.43. m.p.111-114°C

References:

1. Nongkunsarn, P.; Ramsden, C. A. *Tetrahedron*, **1997**, *53*, 3805-3830.
2. Enders, D.; Breuer, K.; Kalfass, U.; Balensiefer, T. *Synthesis*, **2003**, 1292-1295.

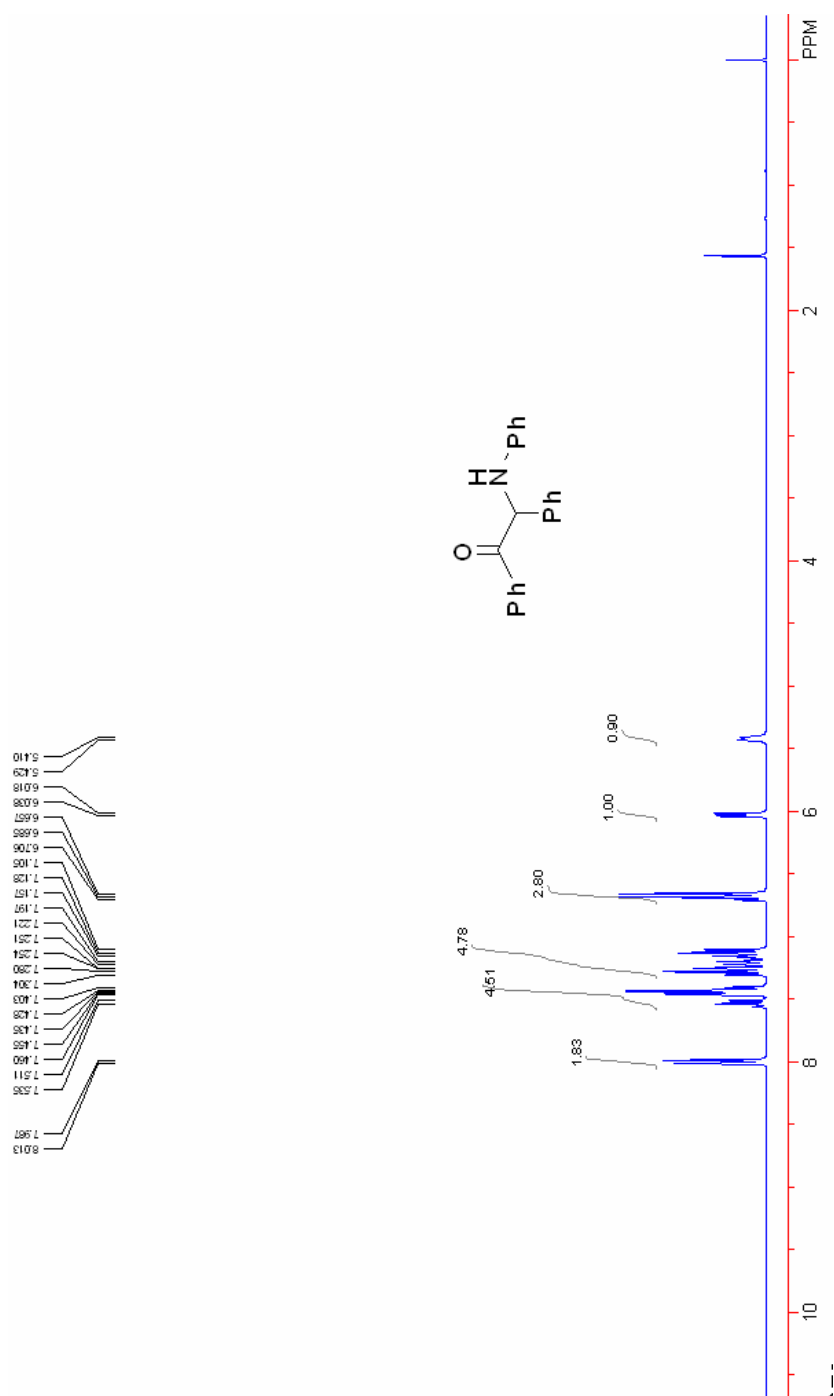

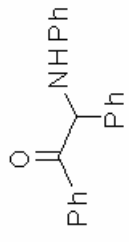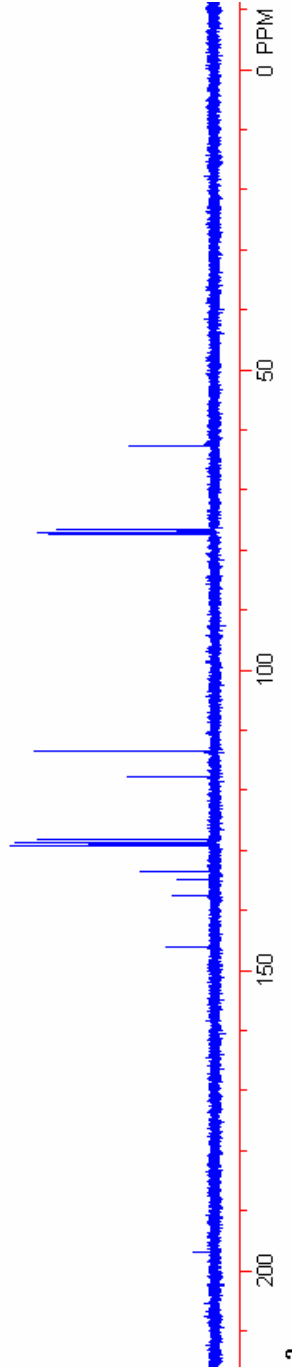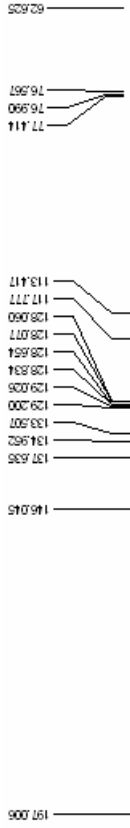



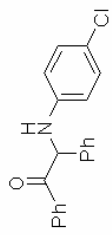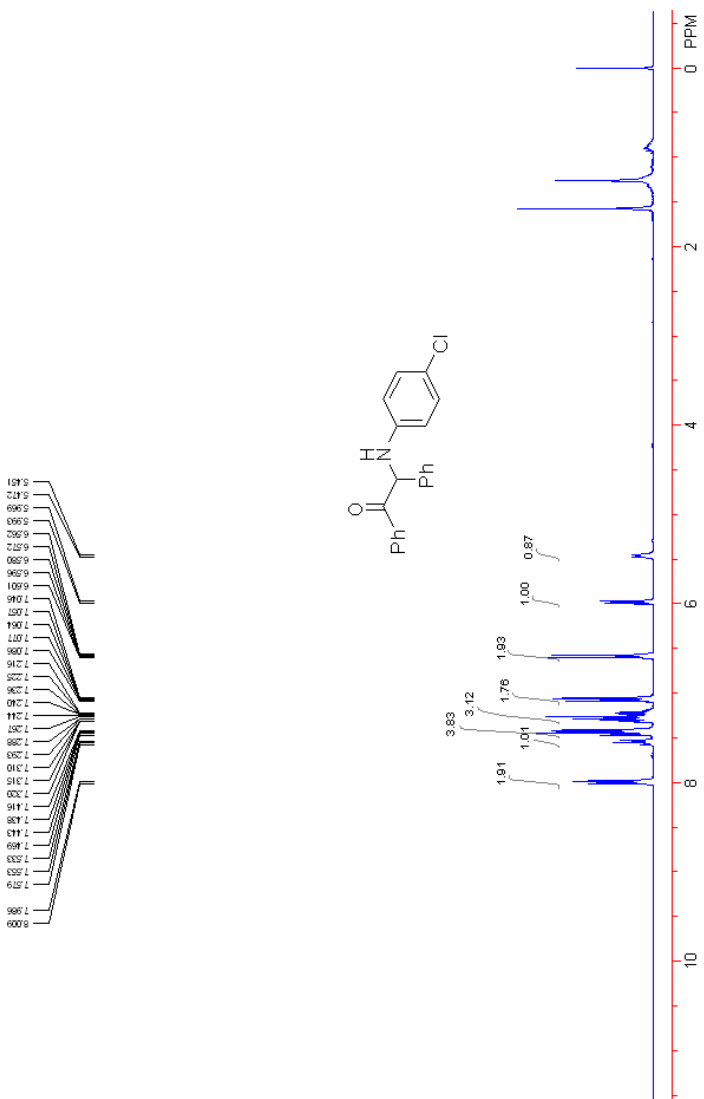

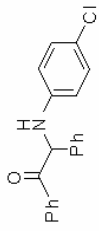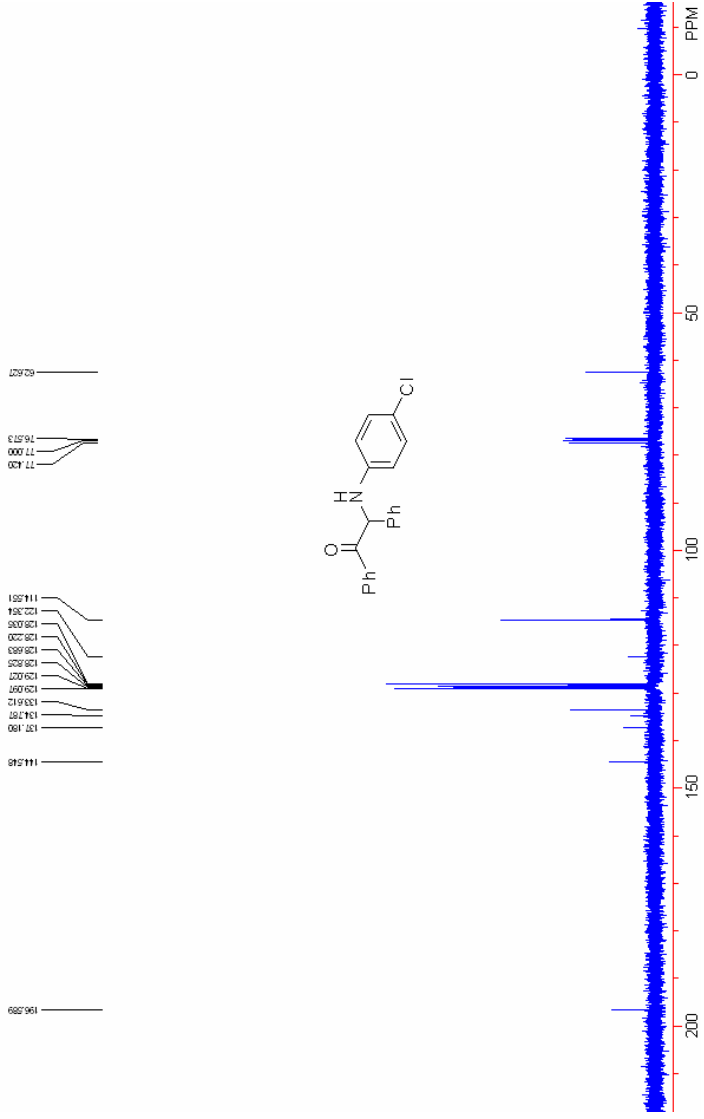

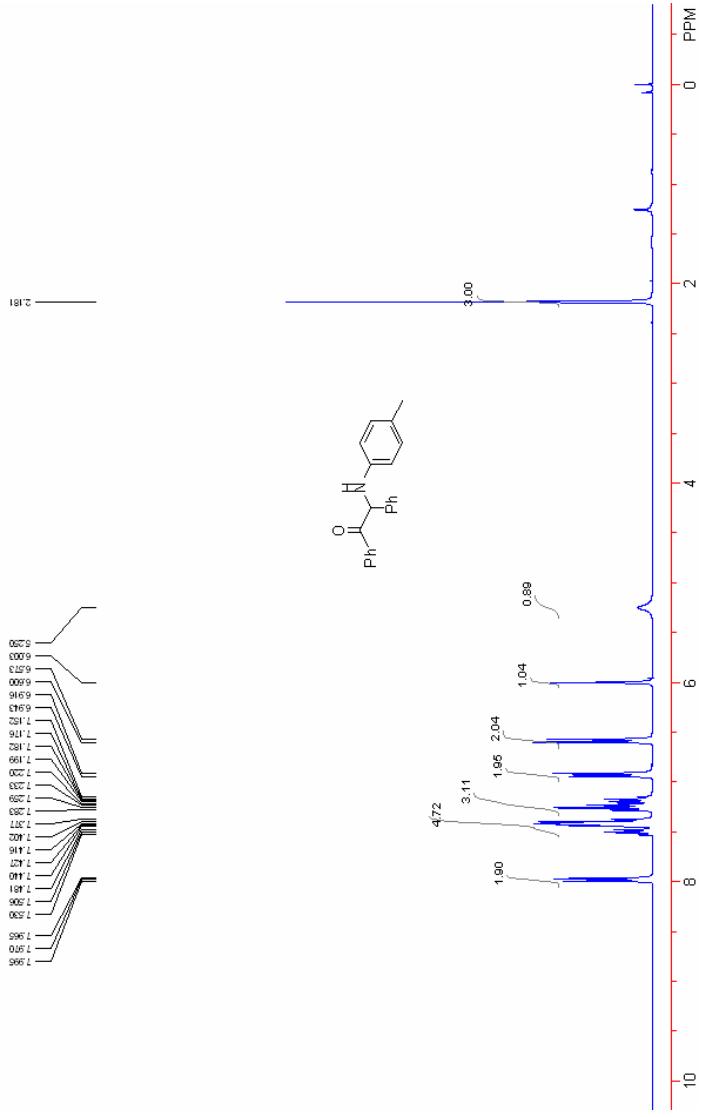

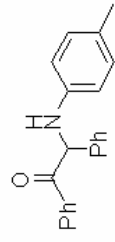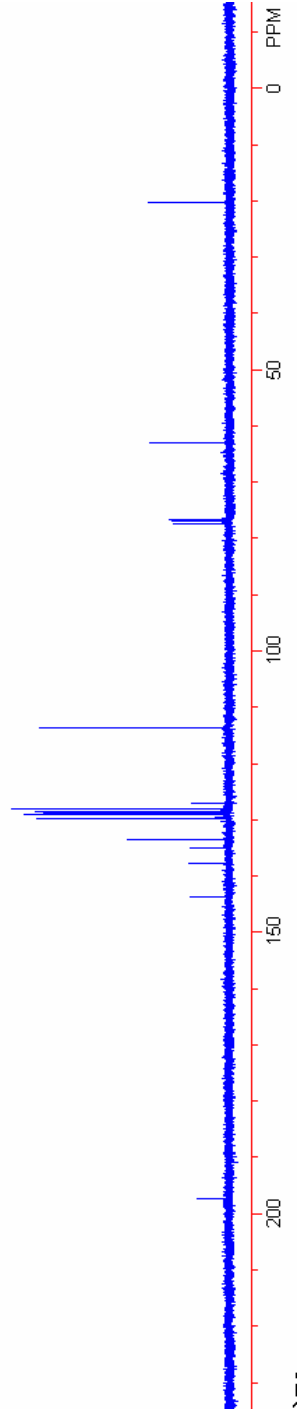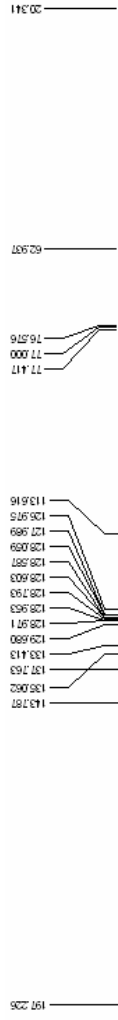

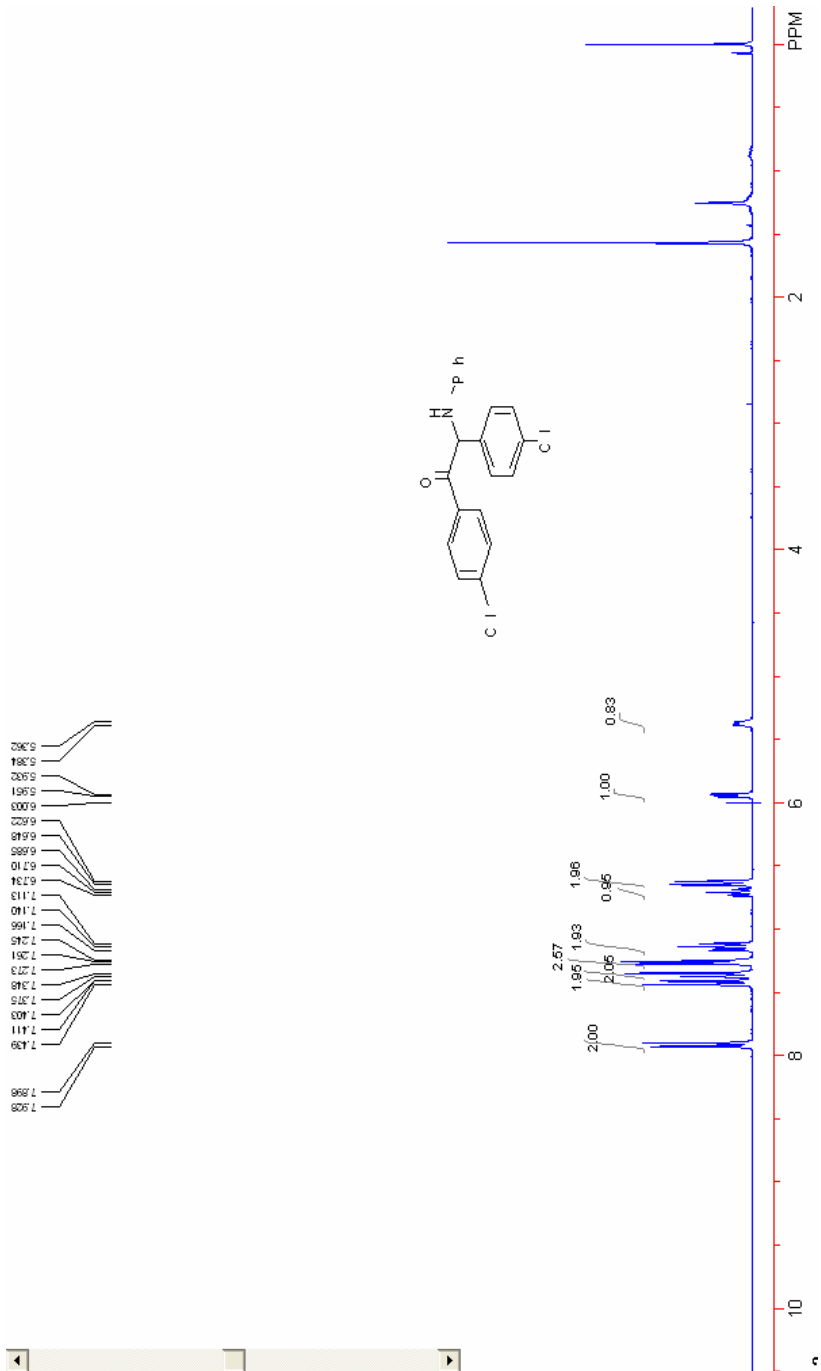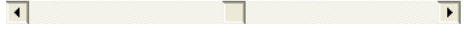

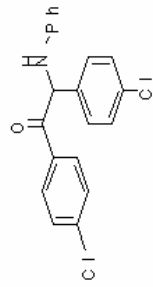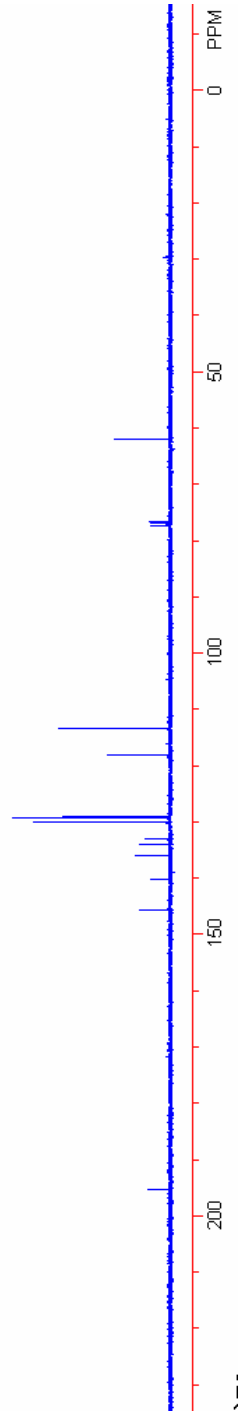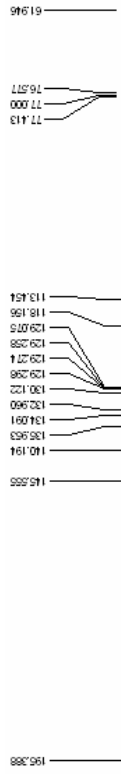



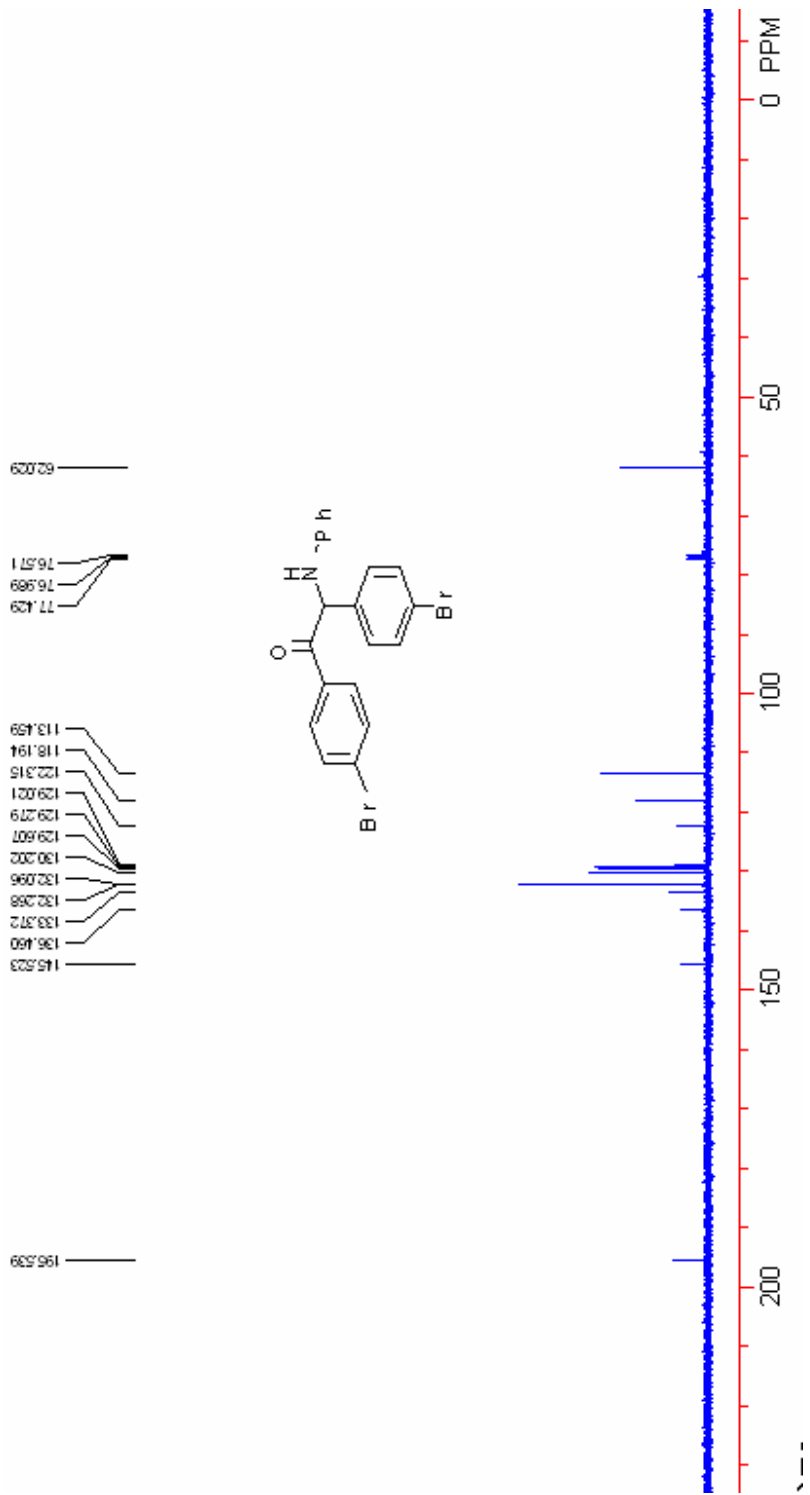

62.029  
77.129  
76.989  
76.571

113.459  
118.191  
122.315  
129.021  
129.279  
129.607  
130.202  
132.096  
132.268  
133.372  
136.160  
145.823

196.539



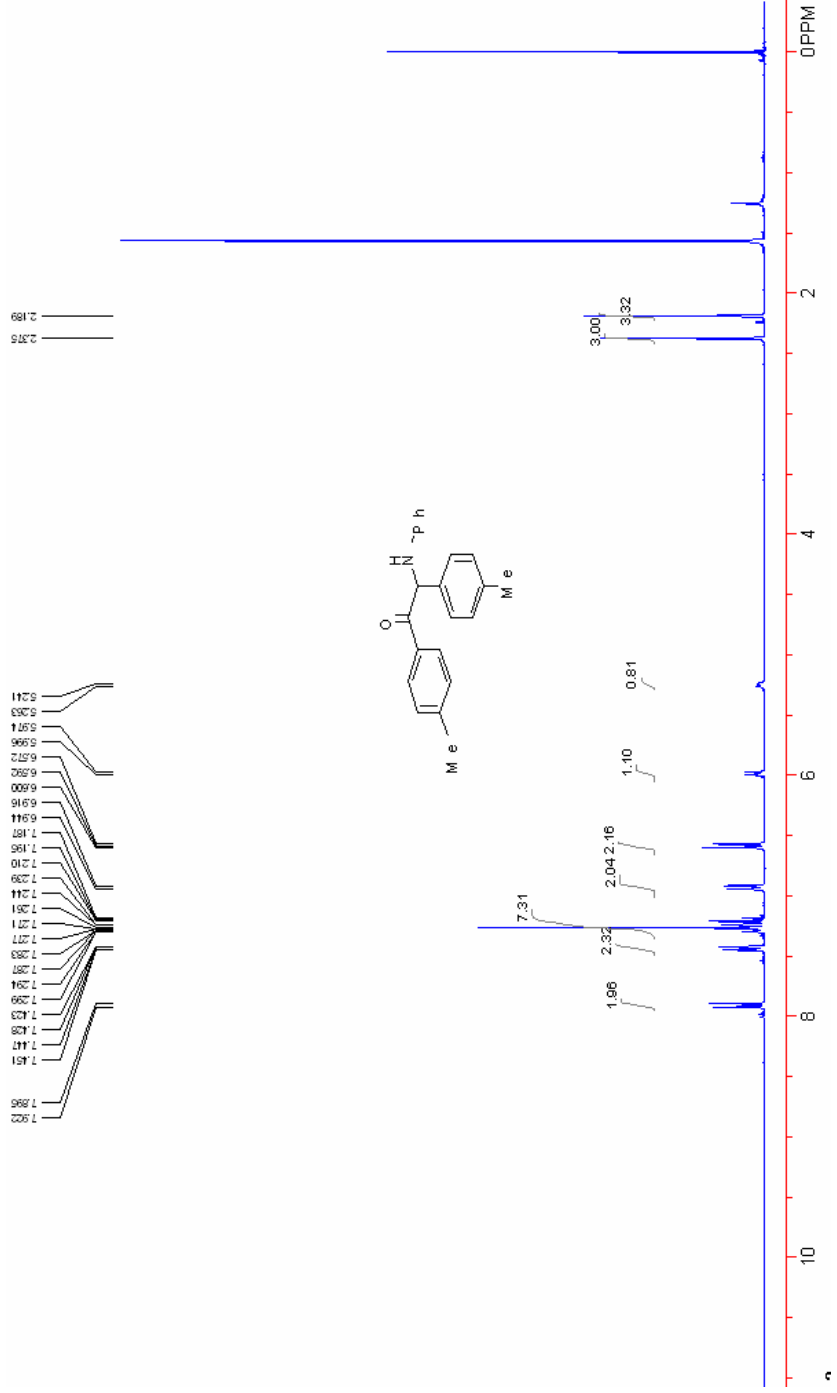

21.651  
20.399

62.145

76.579  
77.000  
77.428

113.600  
126.915  
127.911  
128.045  
128.945  
128.978  
129.396  
132.492  
132.651  
138.073  
143.895  
144.131

196.789

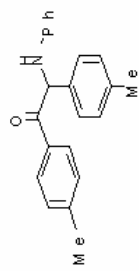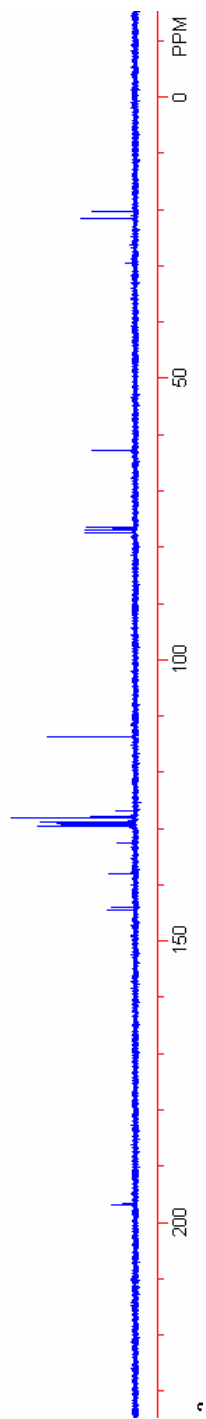

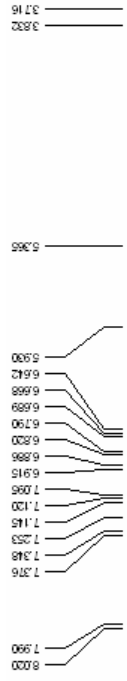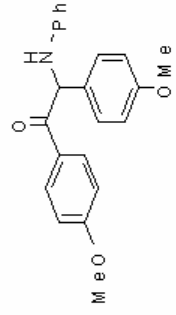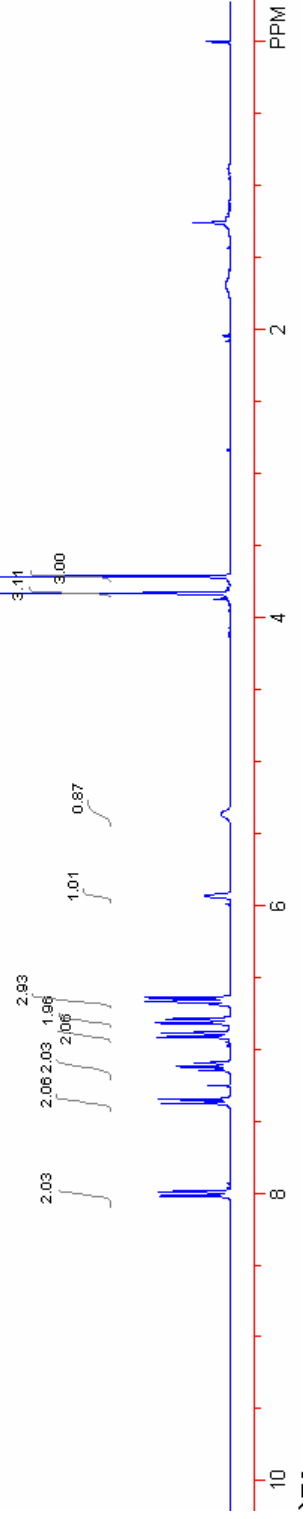

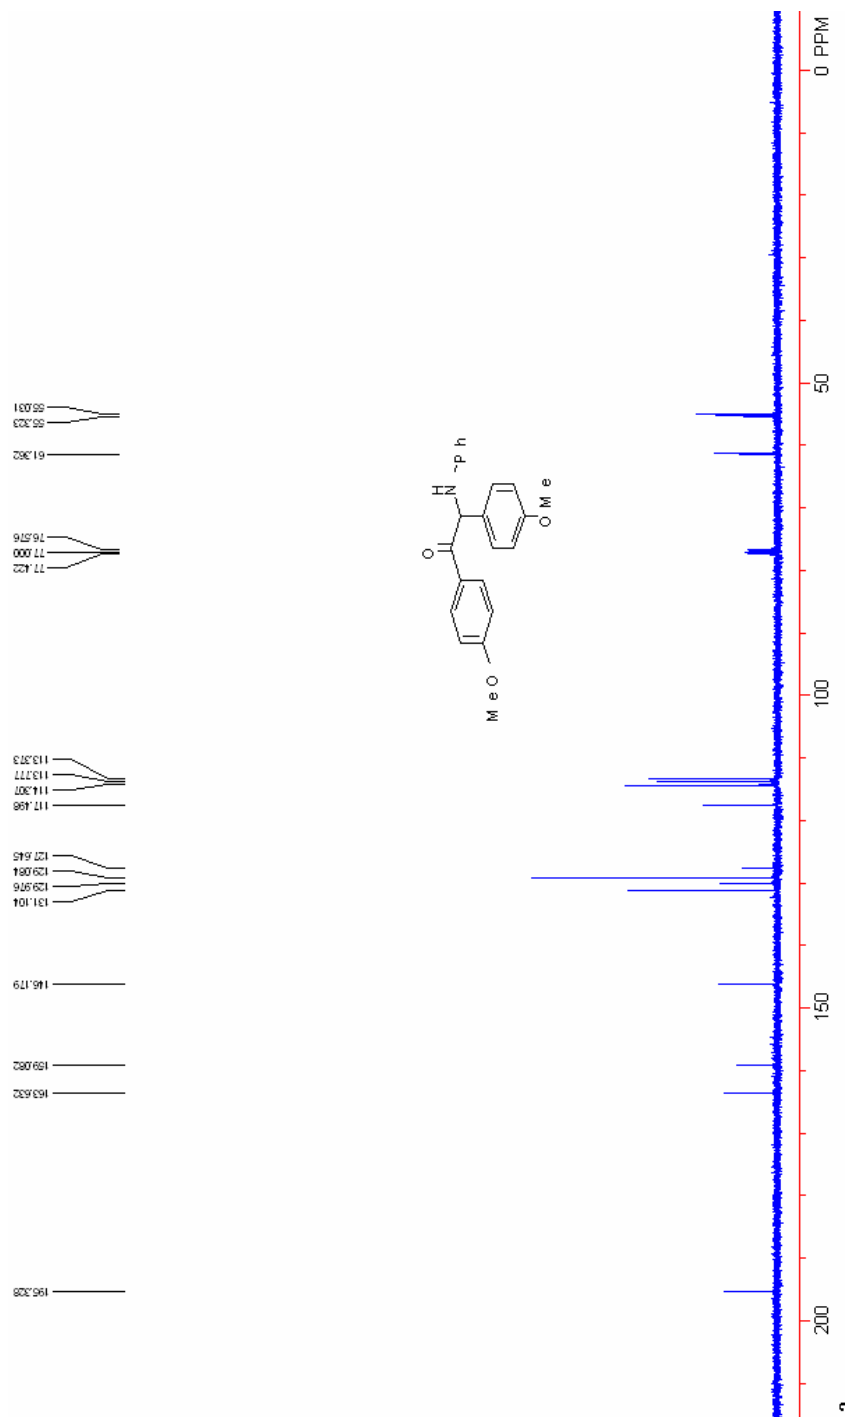

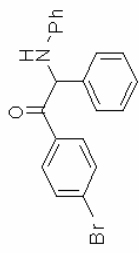

7.874  
7.899  
7.861  
7.834  
7.808  
7.800  
7.796  
7.772  
7.762  
7.752  
7.746  
7.730  
7.721  
7.189  
7.184  
7.130  
1.08  
6.716  
6.693  
6.670  
6.645  
6.604  
5.963  
5.944  
5.914  
5.885  
5.848  
5.801

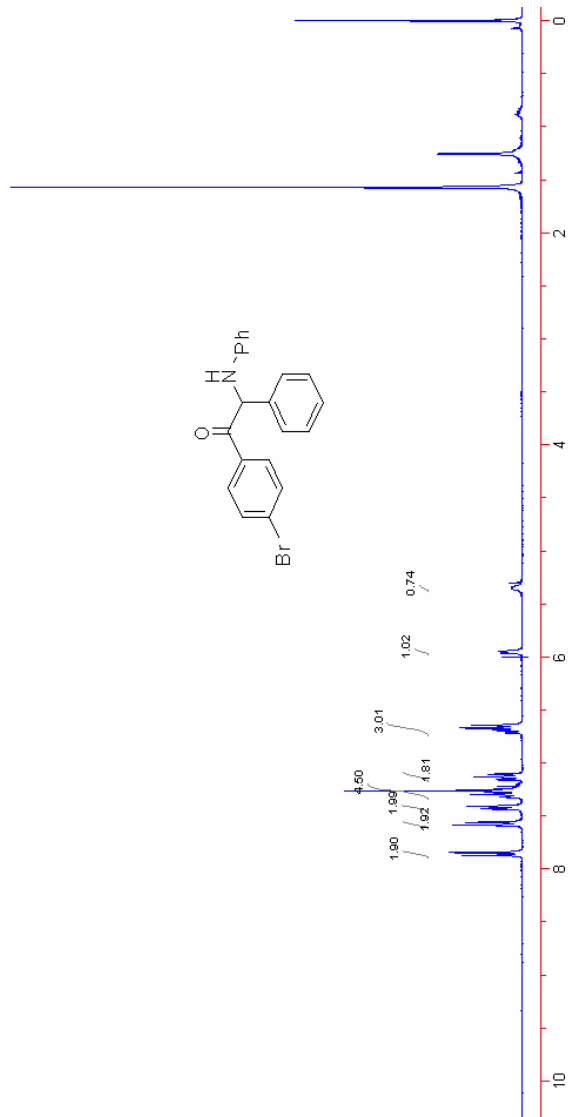

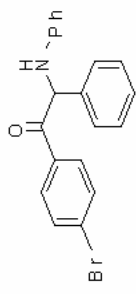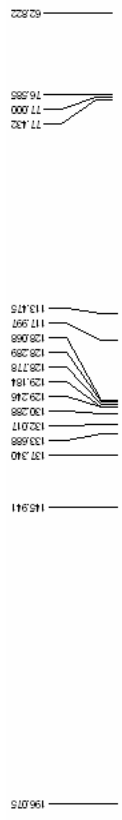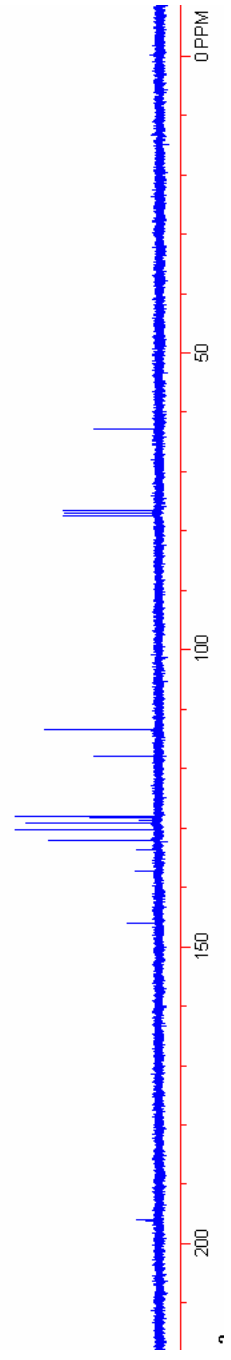

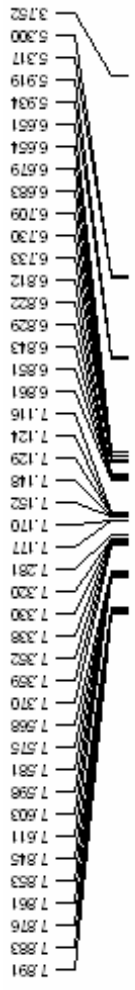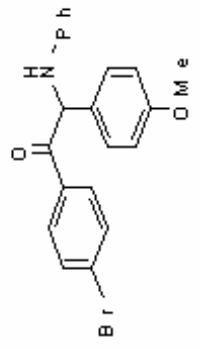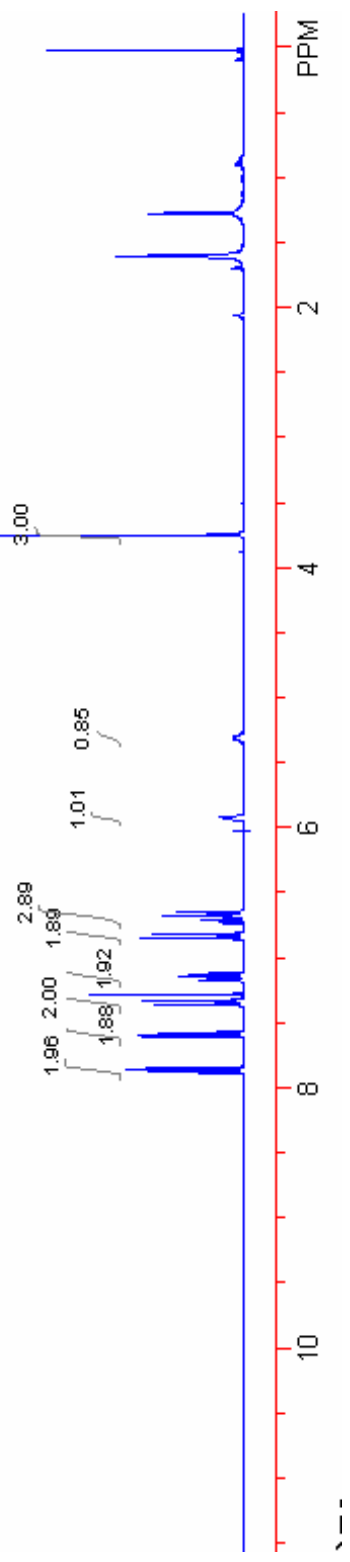

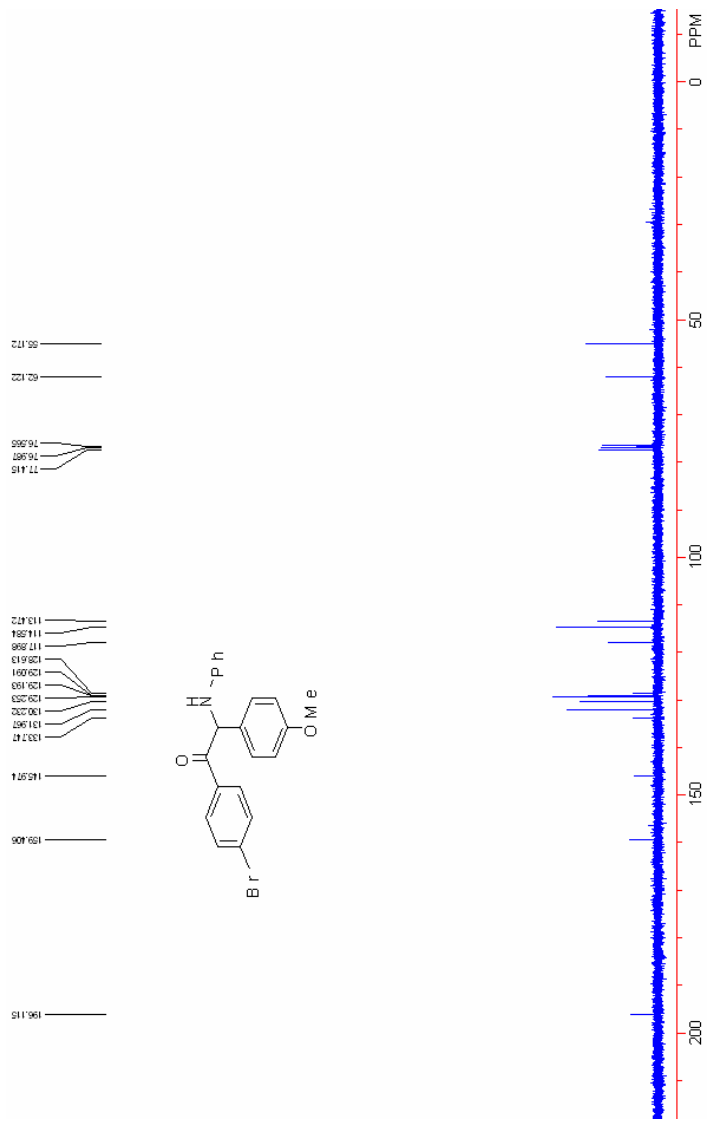



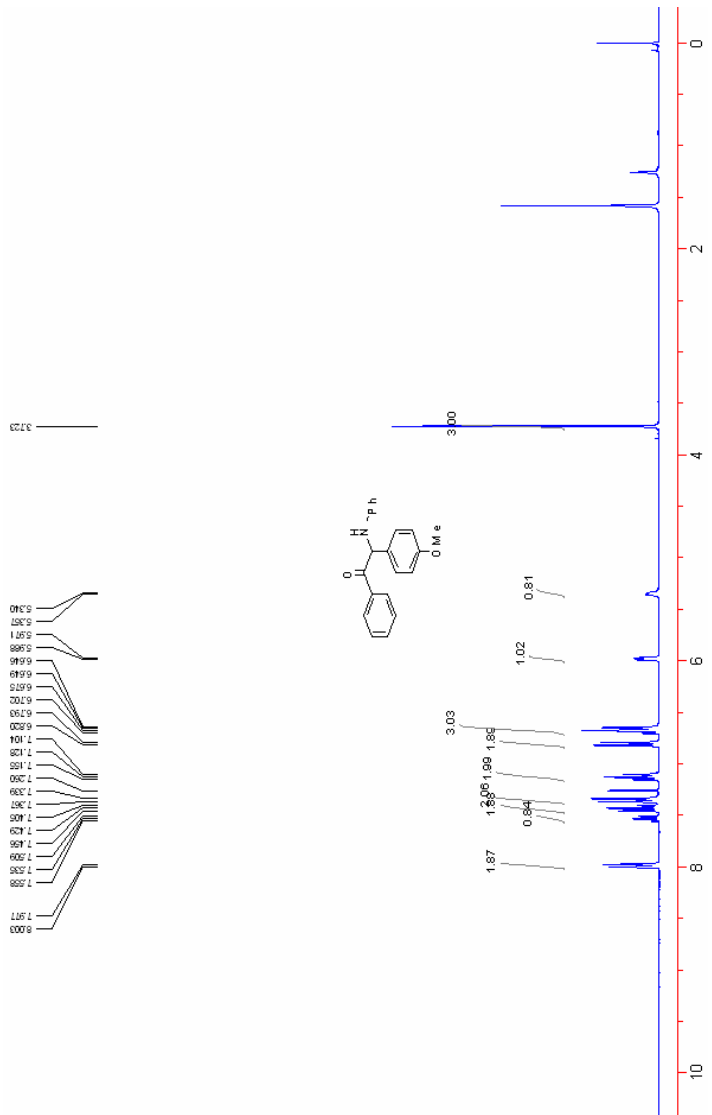

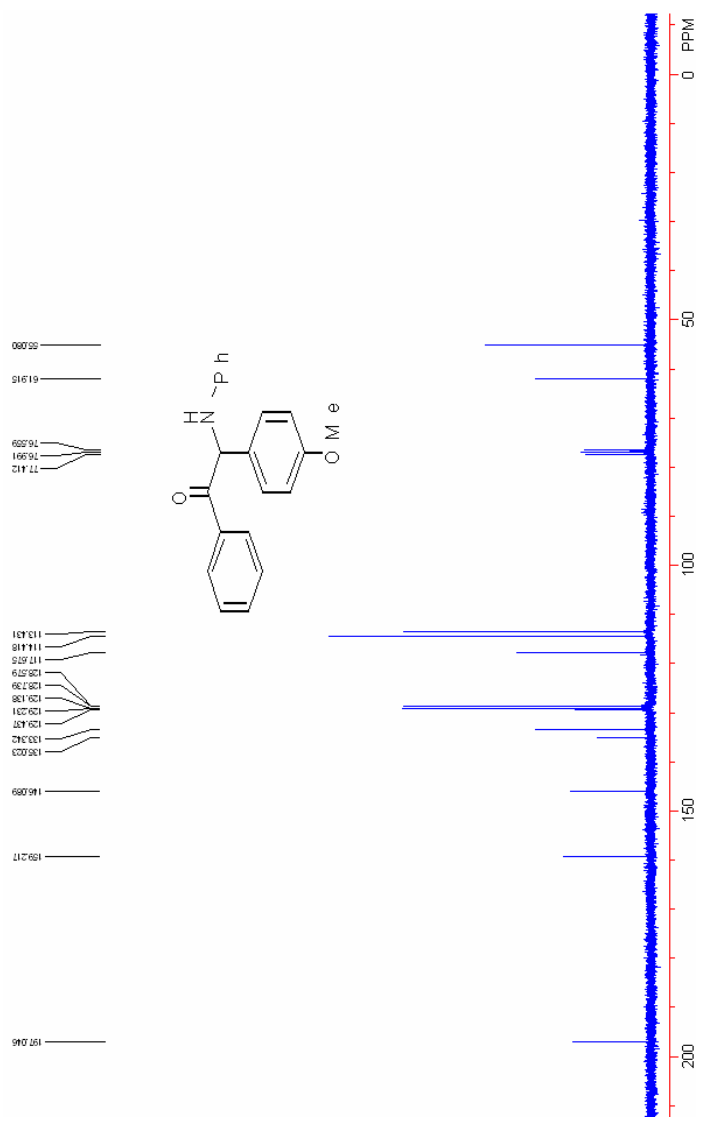

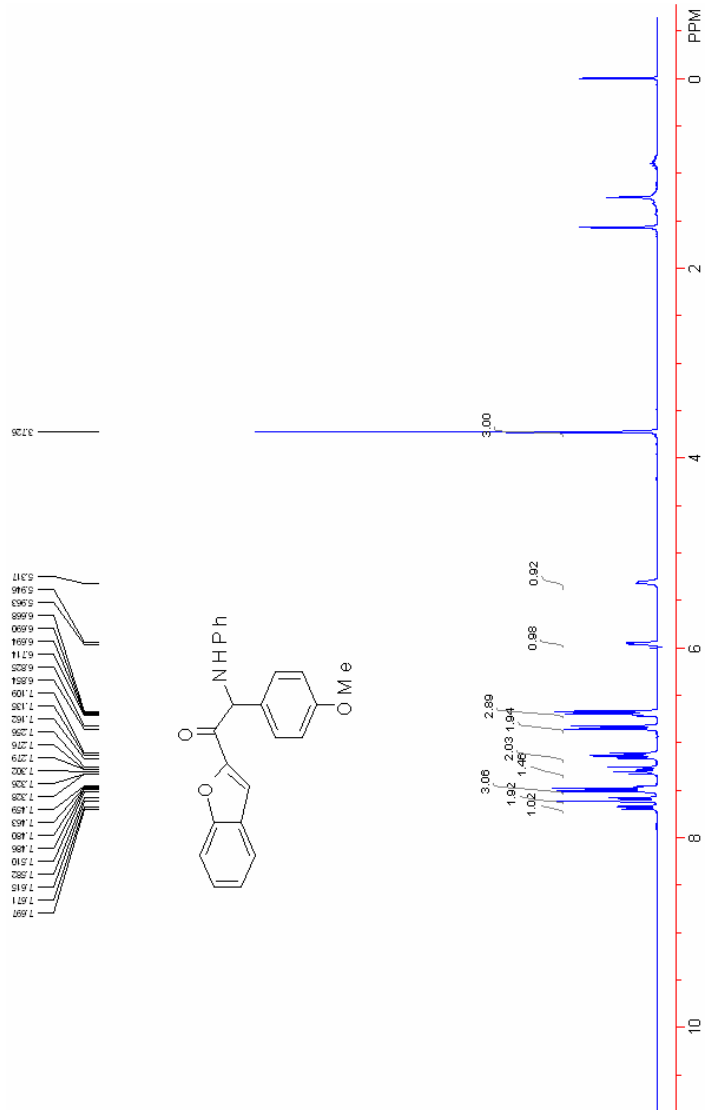

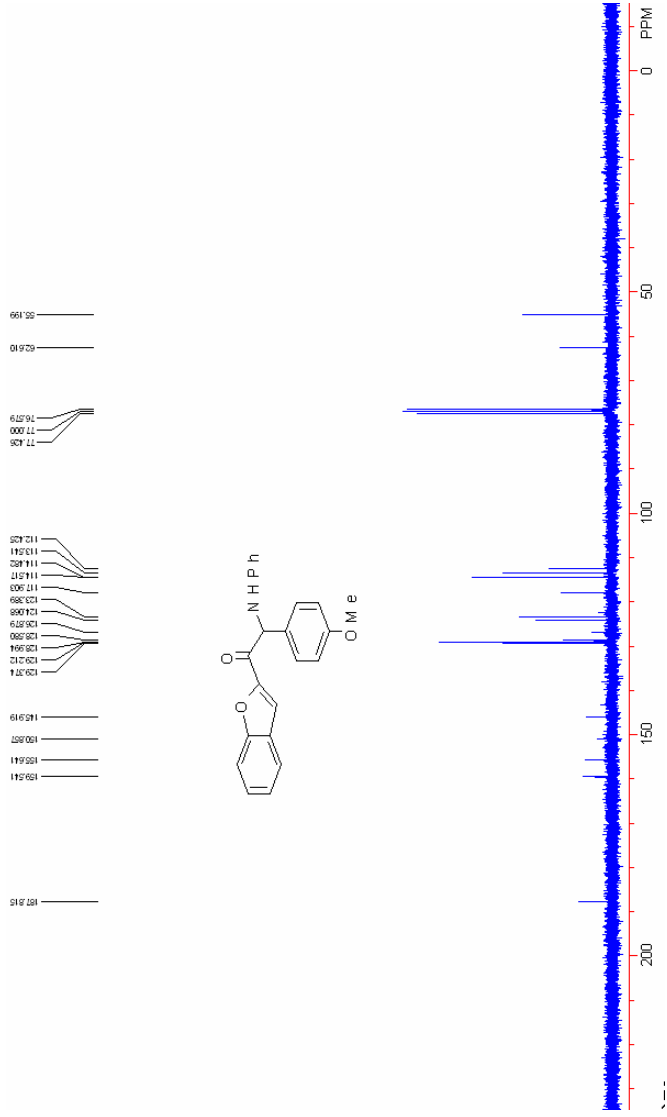

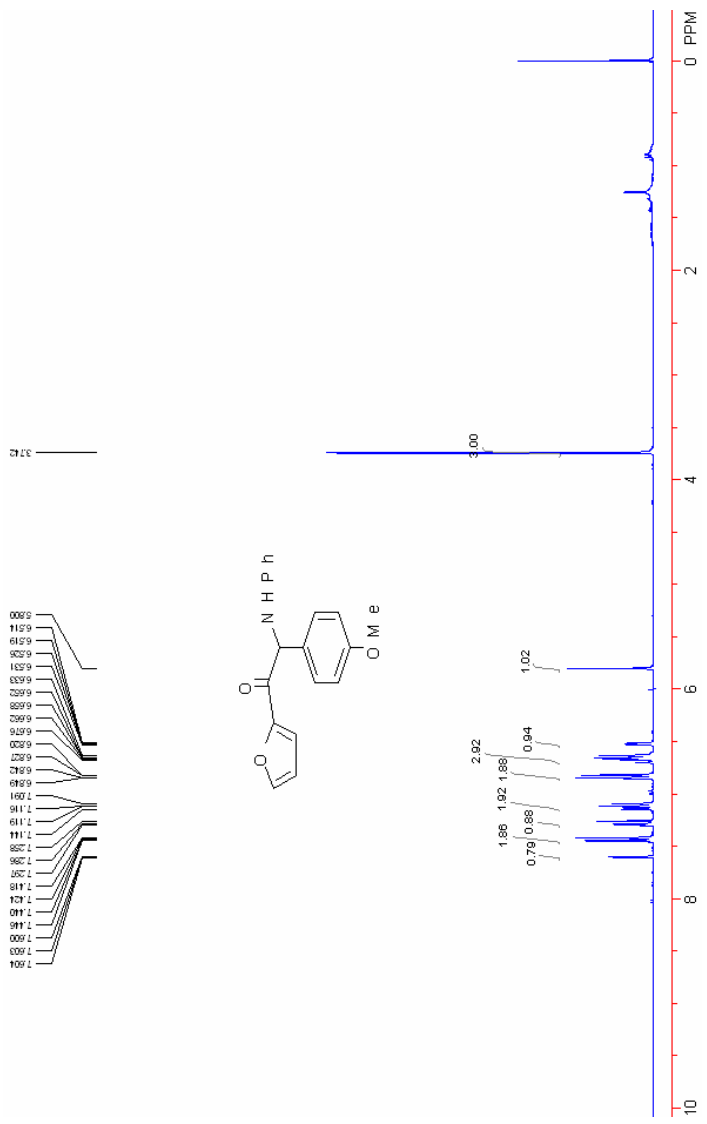

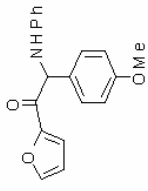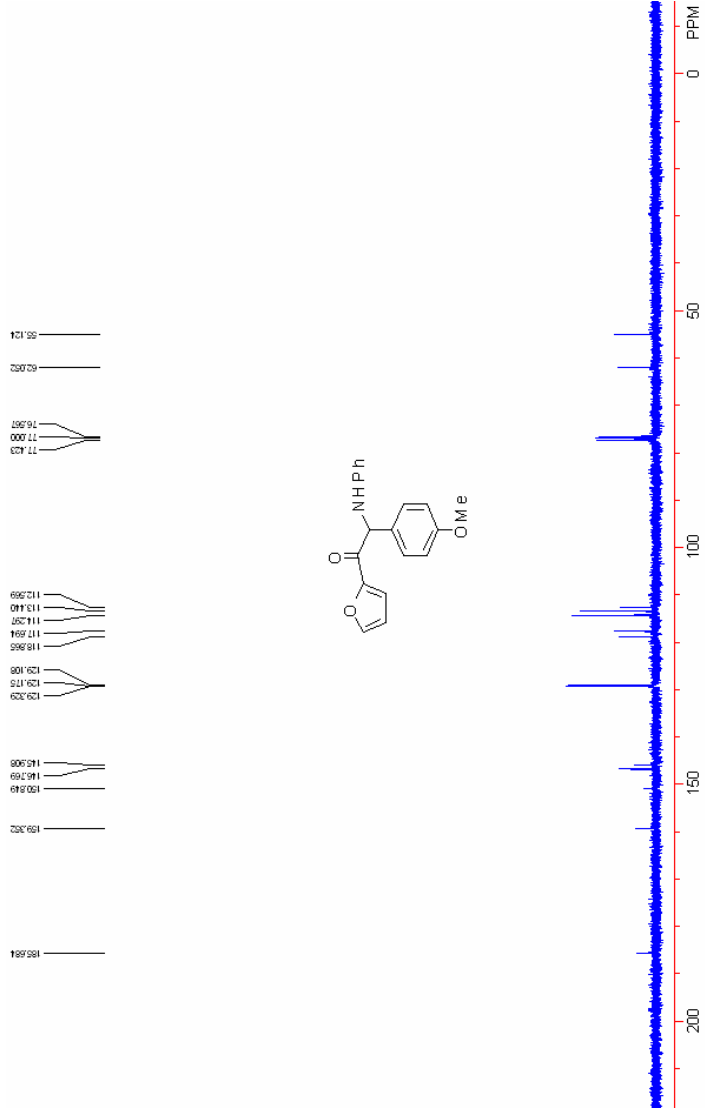

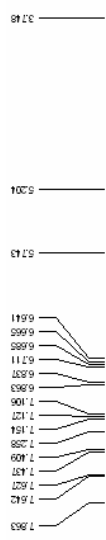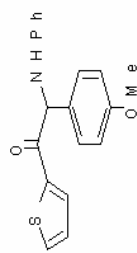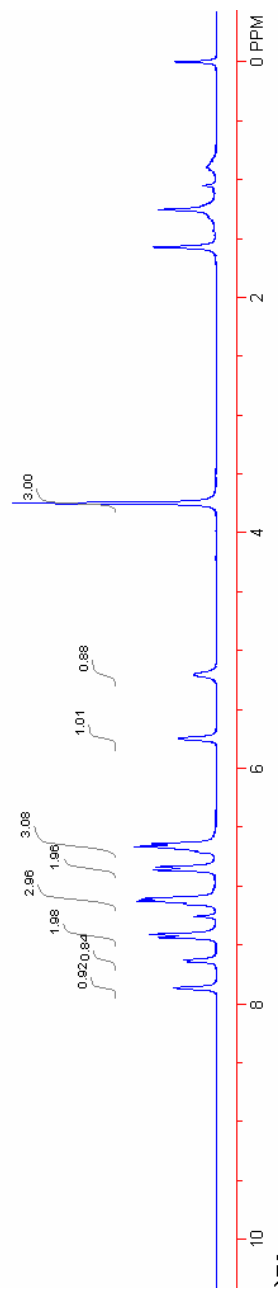

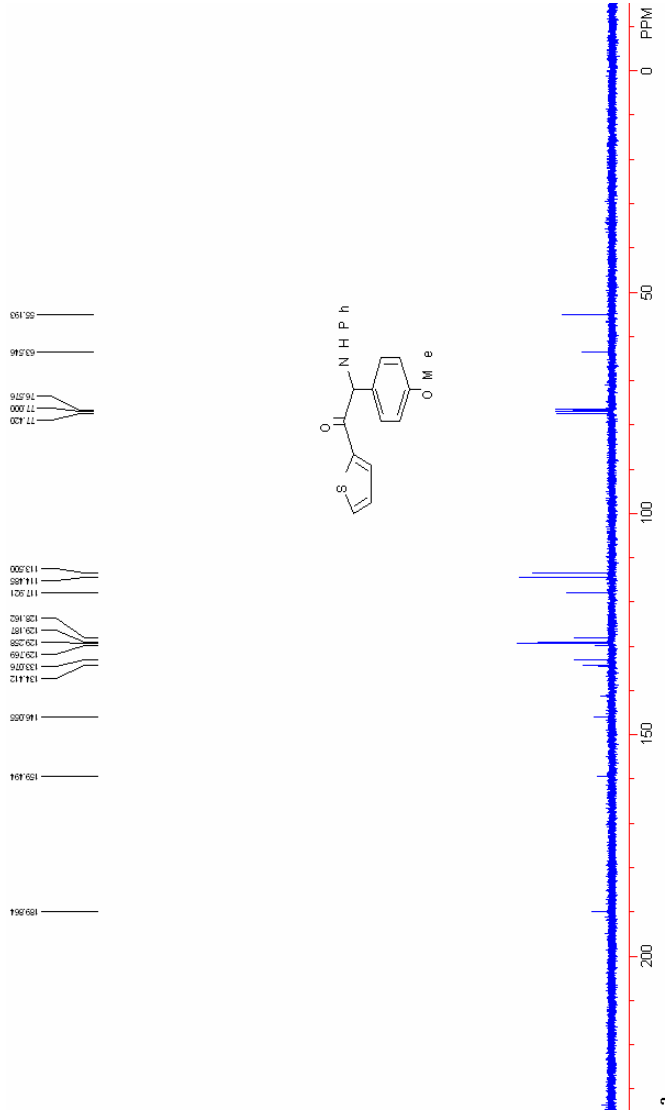

c



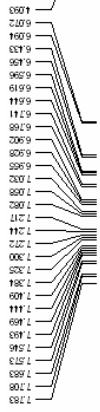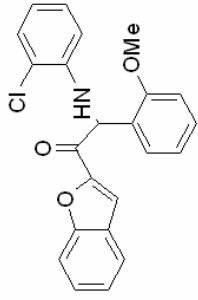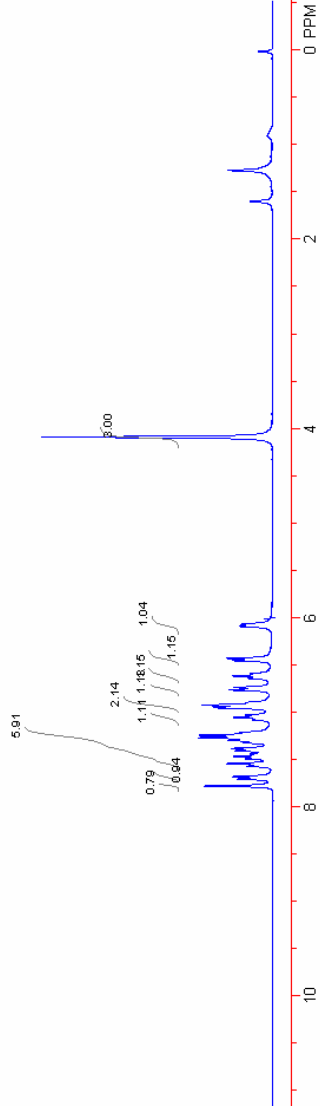

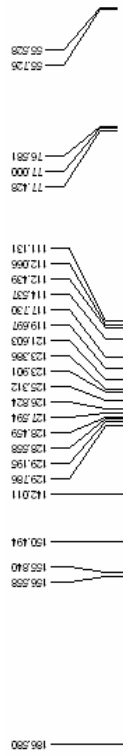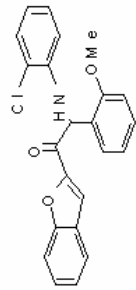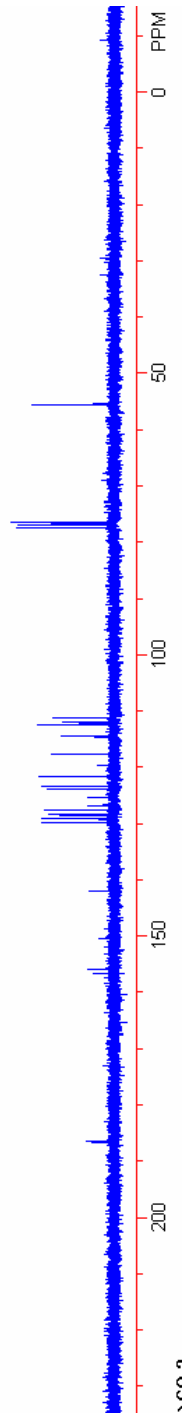

Supplement: b611646a.pdf [file b611646a.pdf]
